# Supplementary material
Source: MDPI journal article supplement (https://www.mdpi.com/2227-9717/11/8/2503)
Supplement: s1 [file s1]

**Table S1.** Central composite design employed in the microwave roasting of the pecan nuts

| Point Type | A: Power (W) | B: Time (min) |
|------------|--------------|---------------|
| Factorial  | 200          | 2             |
| Factorial  | 700          | 2             |
| Factorial  | 200          | 5             |
| Factorial  | 700          | 5             |
| Axial      | 100          | 3.5           |
| Axial      | 800          | 3.5           |
| Axial      | 450          | 1             |
| Axial      | 450          | 6             |
| Center     | 450          | 3.5           |

**Table S2. Constraints**

| Name     | Goal            | Lower Limit | Upper Limit | Lower Weight | Upper Weight | Importance |
|----------|-----------------|-------------|-------------|--------------|--------------|------------|
| A:Power  | is target = 700 | 200         | 700         | 1            | 1            | 3          |
| B:Time   | minimize        | 2           | 5           | 1            | 1            | 3          |
| TCD      | minimize        | 1430.97     | 2145.7      | 1            | 1            | 3          |
| Hardness | is in range     | 24.24       | 33.88       | 1            | 1            | 3          |
| TPC      | maximize        | 1.11        | 1.82        | 1            | 1            | 3          |
| DPPH     | is in range     | 25.7        | 40.01       | 1            | 1            | 3          |

**Table S3. Solutions**

12 Solutions found

| Number | Power   | Time  | TCD      | Hardness | TPC   | DPPH   | Desirability   |
|--------|---------|-------|----------|----------|-------|--------|----------------|
| 1      | 700.000 | 2.458 | 1824.164 | 28.750   | 1.328 | 34.405 | 0.585 Selected |
| 2      | 700.000 | 2.466 | 1822.791 | 28.748   | 1.328 | 34.416 | 0.585          |
| 3      | 699.997 | 2.444 | 1826.520 | 28.752   | 1.329 | 34.384 | 0.585          |
| 4      | 699.996 | 2.487 | 1819.413 | 28.744   | 1.327 | 34.446 | 0.585          |
| 5      | 699.964 | 2.428 | 1829.309 | 28.755   | 1.329 | 34.360 | 0.585          |
| 6      | 700.000 | 2.496 | 1817.827 | 28.742   | 1.327 | 34.460 | 0.585          |
| 7      | 699.999 | 2.517 | 1814.342 | 28.737   | 1.327 | 34.491 | 0.585          |
| 8      | 699.925 | 2.405 | 1833.262 | 28.759   | 1.330 | 34.327 | 0.585          |
| 9      | 700.000 | 2.563 | 1806.841 | 28.724   | 1.325 | 34.557 | 0.585          |

|    |         |       |          |        |       |        |       |
|----|---------|-------|----------|--------|-------|--------|-------|
| 10 | 699.995 | 2.661 | 1791.022 | 28.688 | 1.323 | 34.701 | 0.583 |
| 11 | 699.998 | 3.376 | 1687.819 | 28.043 | 1.303 | 35.741 | 0.554 |
| 12 | 699.999 | 3.621 | 1657.292 | 27.670 | 1.296 | 36.097 | 0.536 |
